## **Within-host genetic diversity of SARS-CoV-2 in the context of large-scale hospital-associated genomic surveillance**

Alexandra A. Mushegian<sup>1</sup>, Scott W. Long<sup>2</sup>, Randall J. Olsen<sup>2</sup>, Paul A. Christensen<sup>2</sup>, Sishir Subedi<sup>2</sup>, Matthew Chung<sup>1</sup>, James Davis<sup>3,4</sup>, James Musser<sup>2</sup>, Elodie Ghedin<sup>1\*</sup>

1. Systems Genomics Section, Laboratory of Parasitic Diseases, National Institute of Allergy and Infectious Diseases, National Institutes of Health, Bethesda, MD USA

2. Laboratory of Molecular and Translational Human Infectious Diseases Research, Center for Infectious Diseases, Department of Pathology and Genomic Medicine, Houston Methodist Research Institute and Houston Methodist Hospital Houston, Texas, 77030

3. Division of Data Science and Learning, Argonne National Laboratory, 9700 S. Cass Ave., Lemont, Illinois, 60439

4. University of Chicago Consortium for Advanced Science and Engineering, 5801 South Ellis Avenue, Chicago, Illinois, 60637

\*corresponding author: [elodie.ghedin@nih.gov](mailto:elodie.ghedin@nih.gov)

## 1 **Abstract**

2 The COVID-19 pandemic has resulted in extensive surveillance of the genomic diversity  
3 of SARS-CoV-2. Sequencing data generated as part of these efforts can also capture  
4 the diversity of the SARS-CoV-2 virus populations replicating within infected individuals.  
5 To assess this within-host diversity of SARS-CoV-2 we quantified low frequency (minor)  
6 variants from deep sequence data of thousands of clinical samples collected by a large  
7 urban hospital system over the course of a year. Using a robust analytical pipeline to  
8 control for technical artefacts, we observe that at comparable viral loads, specimens  
9 from patients hospitalized due to COVID-19 had a greater number of minor variants  
10 than samples from outpatients. Since individuals with highly diverse viral populations  
11 could be disproportionate drivers of new viral lineages in the patient population, these  
12 results suggest that transmission control should pay special attention to patients with  
13 severe or protracted disease to prevent the spread of novel variants.

14

15

16

## 17 **Introduction**

18

19 During the COVID-19 pandemic, emerging variants of SARS-CoV-2 have been globally  
20 tracked due to the rapid acquisition and sharing of whole genome sequence data<sup>1</sup>. As of  
21 July 2022, close to 12 million SARS-CoV-2 consensus genome sequences have been  
22 deposited to the GISAID repository (<https://www.gisaid.org>). These sequences  
23 represent summaries of petabytes of raw sequencing data, which cover the 30Kb RNA  
24 genome of SARS-CoV-2 at high redundancy. These deep sequence data could  
25 potentially be a rich source of information about the emergence of mutations in the virus  
26 population within the infected host, prior to transmission. Because an infected host is a  
27 dynamic, heterogeneous environment in which viruses replicate and compete under  
28 immunological pressure, it is of great interest to understand how much heterogeneity in  
29 the within-host viral population lies beneath the consensus viral genome sequence.

30

31 Studies of within-host viral diversity—variously referred to in terms of minor variants,  
32 quasispecies, low-frequency variants, or intrahost single nucleotide variants (iSNVs)—  
33 infer the viral diversity within a specimen from the relative abundances of sequencing  
34 reads supporting polymorphic sites<sup>2</sup>. Such studies aim to capture de novo mutations  
35 acquired by the virus over the course of within-host replication, as well as mixed  
36 infections acquired through transmission of multiple lineages. In principle, this  
37 information could be used to help predict the emergence of novel variants, to identify  
38 sites under evolutionary selection, or to help track transmission<sup>3</sup>. It is also of interest to  
39 determine if patient characteristics, behavior, or differences in clinical care strategies  
40 influence the magnitude of viral diversity generated and maintained in individual patients  
41 or during transmission. For example, there is evidence that SARS-CoV-2 variants with  
42 multiple novel mutations have emerged in patients with protracted infections<sup>4</sup>.

43

44 However, the existing studies also acknowledge that such inferences must be made  
45 cautiously. Within-sample read diversity can also be due to sample contamination,  
46 especially with aerosolized PCR product; biases generated during reverse transcription,

47 PCR, enrichment, and library preparation steps; sequencing errors; and artefacts  
48 generated during bioinformatic processing and read mapping<sup>5</sup>. Well-established  
49 methods exist for accounting for these processes when it comes to assembling  
50 consensus sequences, but it is considerably more difficult to accurately quantify within-  
51 sample variation without making special efforts to counteract these sources of error.  
52 Therefore, it is crucial to develop best practices for inferring minor variant diversity from  
53 viral deep sequencing data, especially from opportunistic datasets generated with  
54 consensus genome sequences as the primary goal and not minor variant analysis.

55

56 We explored the feasibility of extracting actionable signals about within-host viral  
57 genetic diversity from the deep sequence data underlying consensus genomes by  
58 focusing on a cohort from the Houston Methodist Hospital System. A network of eight  
59 hospitals and an associated research institute serving a demographically diverse city of  
60 7 million people, HMM began using high-output Illumina instruments to sequence all  
61 SARS-CoV-2 specimens coming through the system in December 2020. End-to-end  
62 processing of samples, from collection through read generation, occurred within the  
63 same set of facilities and protocols with a high level of technical standardization and  
64 automation. The resulting consensus sequences were deposited in GISAID and used to  
65 track epidemiological trends in Houston<sup>6-8</sup>. The dataset is unique in that it densely  
66 samples a large population over an extended period of time with rich patient metadata  
67 linked to samples. However, these same advantages come with challenges from the  
68 perspective of minor variant tracking: samples are processed approximately  
69 sequentially, not in controlled or randomized batches, and there is limited opportunity in  
70 an active high-throughput sequencing facility of this scale to sequence technical  
71 replicates.

72

73 Previous studies of minor variants that carefully addressed sources of error and  
74 uncertainty have emphasized different aspects of within-host viral diversification<sup>9-12</sup>.  
75 Despite methodological differences, several broad observations have been consistent  
76 across studies: within-host diversity is generally low, albeit with some outlier samples

77 containing high diversity; and within-host mutations apparently independently recur  
78 frequently between samples, impeding attempts to use minor variant information to infer  
79 transmission. We used our large dataset to delve more deeply into unanswered  
80 questions surrounding these observations. First, we used the patient metadata available  
81 to explore whether there are any patient characteristics associated with high minor  
82 variant richness, since such individuals might be disproportionate drivers of the  
83 emergence of new consensus mutations in an analogous way to a small number of  
84 patients driving superspreading events. Second, we examined a set of highly recurrent  
85 minor variants to investigate how many were systematic technical artefacts vs.  
86 hypermutable sites with potential phenotypic consequences. Theory and empirical data  
87 show that biases in de novo generation of mutations can skew evolutionary trajectories,  
88 with convergent traits often arising via pathways involving hypermutable sites.<sup>13,14</sup> We  
89 find that while both phenotypically important mutations and probable artefacts regularly  
90 recur as minor variants, a robust association between high within-host virus diversity  
91 and patient hospitalization (admission into inpatient or ICU care) could be detected. The  
92 mechanism and direction of this association is unknown, but this observation supports  
93 the conclusion that transmission control in healthcare settings or from severely ill  
94 patients should be of particular focus in preventing the emergence of new variants.

95

## 96 **Results**

97

### 98 *Sample inclusion criteria, minor variant detection and reproducibility*

99 Between the beginning of December 2020 and the end of November 2021, a total  
100 39,880 samples were collected at Houston Methodist, encompassing a wide range of  
101 symptomatic and asymptomatic patients and healthcare workers. These were  
102 sequenced across 70 NovaSeq sequencing runs. We narrowed down the dataset  
103 considerably according to various criteria such as the sequencing depth and the input  
104 quantity of viral RNA, approximated by the quantitative PCR cycle threshold value, Ct  
105 (see *Methods*). Since no-template negative controls were not sequenced, we used  
106 Ct $\geq$ 40 samples as pseudo-negative controls to assess the level of background PCR

107 amplicon contamination in each run, reasoning that background contamination of deeply  
108 sequenced samples does not necessarily impact consensus sequence calling but can  
109 affect the appearance of within-host diversity. We excluded runs containing at least  
110 three  $Ct \geq 40$  samples in which the coverage breadth and depth were not statistically  
111 different from the  $Ct < 40$  samples in the run ( $t\text{-test} \geq 0.01$ ). This conservative criterion  
112 resulted in the exclusion of 22 sequencing runs. We also limited all our analyses to  
113 samples with at least 100x coverage over at least 98% of the genome, and excluded  
114 samples where the consensus sequence was flagged as poor quality by Nextclade<sup>15</sup> or  
115 that did not have a lineage assigned by Pango<sup>16</sup>, and used the earliest available sample  
116 from patients from whom multiple samples were collected. These initial filtering criteria  
117 narrowed the dataset to 15,389 samples with a lower average Ct value (19.96) than the  
118 total population (23.47) (**Fig. 1a**).

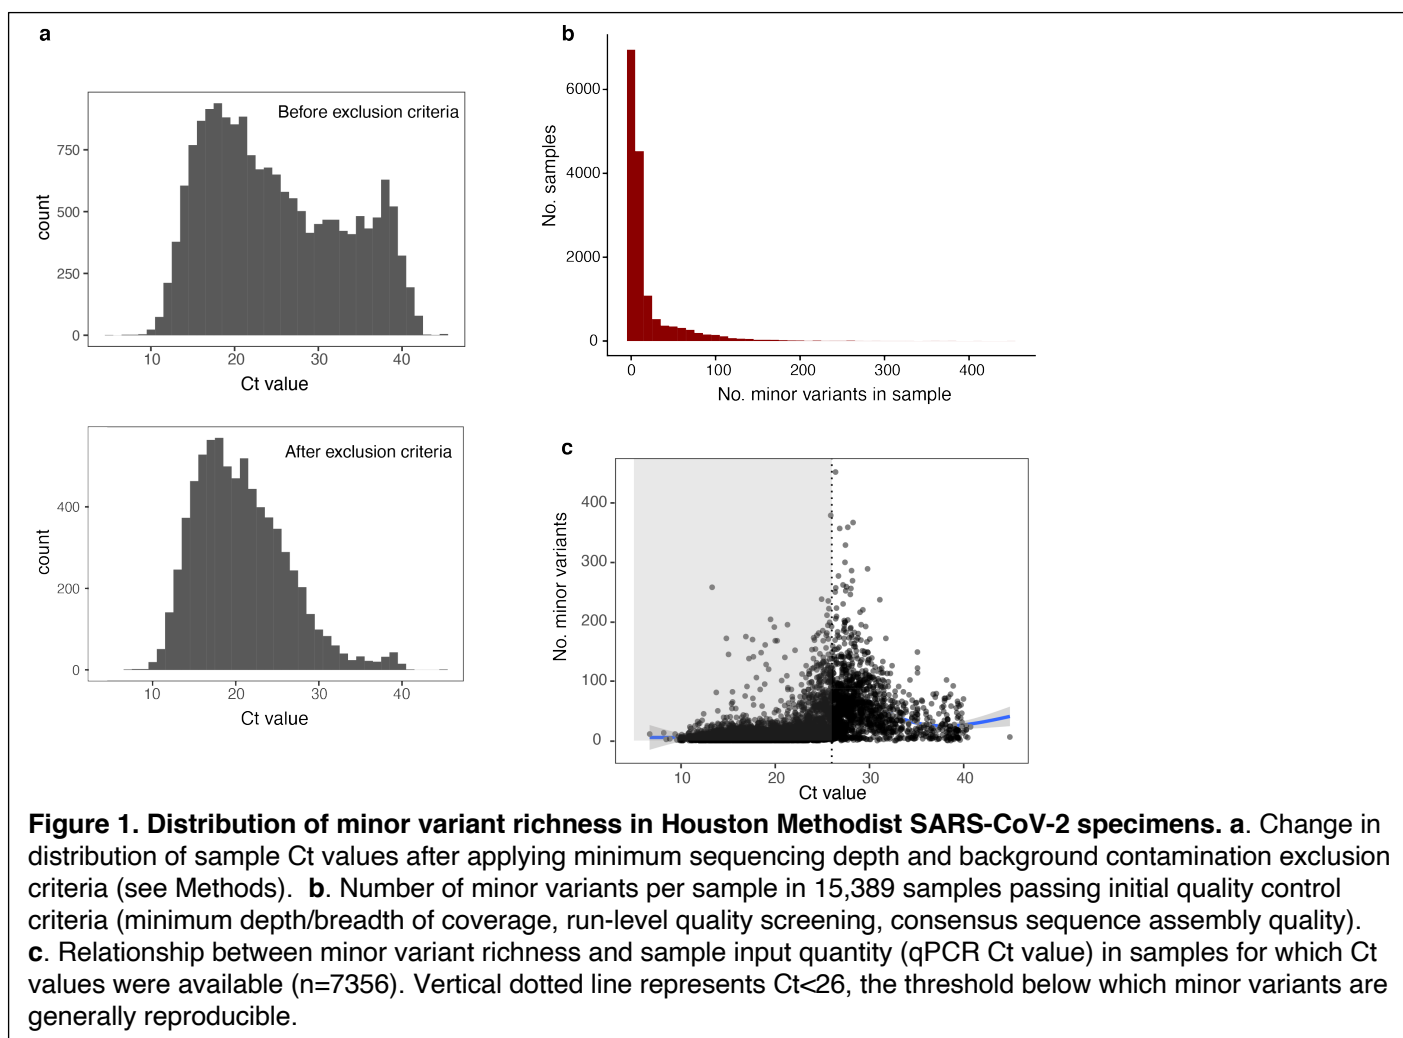

119

120 Minor variants were identified using a variant calling pipeline (*timo*), which was  
121 previously demonstrated to have high precision and recall of minor variants, given a  
122 background rate of sequencing error<sup>5</sup>. The output of this pipeline also differs from many  
123 minor variant callers in that it identifies minor variants that are reversions to the  
124 ancestral reference allele at sites where the consensus allele differs from the reference.  
125 We considered minor variants at sites with a total depth of coverage of at least 100  
126 reads, where the minority variant made up at least 1% of reads at the site at a minimum  
127 depth of 50 reads (thus requiring a more stringent standard of minimum minor variant  
128 frequency at sites with lower coverage). We excluded any minor variants at PCR primer  
129 binding sites of either of the primer sets used over the course of the study, and  
130 excluded any sites called as gaps or Ns in the consensus or minority fraction. For 54 of  
131 the samples, technical replicates re-sequenced from the original RNA were available,  
132 which we used to assess how many of the minor variants were reproducible. We found  
133 that both the presence/absence and within-host frequency of minor variants were highly  
134 reproducible in samples with Ct values <26 (**SuppFig.1 a,b**). This was consistent with  
135 the range of input quantities at which minor variants were reproducible in several  
136 previous studies<sup>11,17</sup>. At higher Ct values, many more minor variants failed to be  
137 detected in the second replicate of sequencing or were detected but at substantially  
138 different frequencies. Sequencing depth either across the whole genome or at individual  
139 sites was not clearly associated with reproducibility (**SuppFig.1 c,d**). We thus  
140 concluded that minor variants were more likely to be spurious in lower-input samples  
141 but were reliably detected in a single replicate of sequencing in higher-input samples,  
142 and that sample input amount rather than sequencing depth was a more reliable  
143 indicator of sample quality for this purpose.

144

#### 145 *Within-host minor variant diversity*

146 In the 15,389 samples passing the initial quality control criteria, 9,771 (63%) contained  
147 minor variants at fewer than 10 nucleotide positions, with a long tail of samples  
148 containing much higher diversity (**Fig.1b**). Consistently with previous studies<sup>9</sup>, there was

149 a strong correlation with Ct value, with the most diversity concentrated in moderately  
150 low-input samples (Ct~28-30) (**Fig.1c**). There could be technical or biological reasons  
151 for higher minor variant richness in lower viral load samples: they are inherently more  
152 variable due to stochastic sampling and thus are more sensitive to contamination and  
153 technical artefacts, but they also could have been collected early or late in the infection,  
154 reflecting different points in the mutation/selection trajectory of the viral population.  
155 Given the previous findings about reproducibility, we limited further analysis to samples  
156 with Ct<26, acknowledging that although minor variant data from these samples is likely  
157 more accurate, this stringent criterion likely affects the composition of the patient cohort  
158 studied, since it excludes patients with low viral loads. Because diagnostic PCR was  
159 carried out on different instruments across the healthcare system, Ct values were not  
160 available for all samples; thus the final dataset contained 6,140 samples. The median  
161 number of minor variants in samples in this dataset was 5, with a maximum of 379. A  
162 slight positive association with Ct value remained, which is likely due to genuine  
163 biological factors in this range of input values (**Fig.1b**, *grey region*).

164  
165 The final dataset of samples spanned 47 sequencing runs encompassing several  
166 distinct stages of the epidemic. In December 2020 and early January 2021, the  
167 dominant consensus sequences were from variant B.1.2 and an assortment of smaller  
168 lineages. Starting in late January, a period of declining cases was strongly dominated  
169 by the Alpha variant (B.1.1.7), which was replaced in July by the Delta variant  
170 (B.1.617.2) in a late summer/autumn surge (**SuppFig.2**). Sample collection dates were  
171 roughly, but not completely, chronologically associated with runs (**SuppTable 1**). Even  
172 after stringent filtering criteria, there remained a run-level effect on the detection of  
173 minor variants, which appeared to be related to the run-level average of sequencing  
174 depths rather than individual sample sequencing depths (**SuppFig.3**). Sequencing  
175 batch effects are therefore important to consider when assessing minor variant diversity.

176

177 *Clinical correlates of within-host diversity*



178 Having controlled as much as possible for artefacts and systematic errors, we next  
179 determined if unusually high minor variant richness was associated with any clinical  
180 features. From available medical records, we obtained deidentified data on patient  
181 demographics (age group, sex, and ethnicity), comorbidities (chronic heart, lung, liver  
182 and kidney disease; hypertension; diabetes; obesity; HIV status; previous organ  
183 transplant status; cancer), and aspects of clinical treatment (whether the patient was  
184 hospitalized and/or was treated with plasma or monoclonal antibodies). Because many  
185 of these factors are highly correlated with each other, we used a random forest  
186 classification model to query the relative importance of these factors in grouping  
187 samples as “high diversity” or “low diversity.” We considered “high diversity” samples to  
188 be those with more than 5 minor variants, which was the median number. While the  
189 overall performance of the random forest model was poor (ROC AUC=0.58), suggesting  
190 that the clinical features included were insufficient to classify high vs. low diversity  
191 samples without additional information, the most important variable in the trained model  
192 was hospital admission. A chi-squared test confirmed that high-variant samples were  
193 overrepresented among hospitalized patients—treated as inpatients or admitted to  
194 intensive care—compared to outpatients ( $X^2 = 131.58$ ,  $df = 1$ ,  $p < 2.2e-16$ ). The odds  
195 ratio of the association of hospitalization with high minor variant diversity was 1.84 (95%  
196 CI 1.66-2.05). There was a higher proportion of hospitalized patients, as compared to  
197 non-hospitalized individuals, with at least 1 minor variant, more than 5, or more than 10  
198 minor variants in the sample (**SuppFig.4**).

199  
200 To take sample viral input amount and sequencing run batch into account, we  
201 constructed a linear mixed effects model with hospital admission and sample Ct value  
202 as fixed effects, sequencing run as a random effect, and the log-transformed number of  
203 minor variants in the sample as the response variable. Hospital admission and Ct value  
204 were both significantly associated with minor variant diversity (**Table 1a, Fig.2a**).

205 One plausible reason samples from patients requiring hospitalization could have higher  
206 minor variant richness is if they were on average collected later in the infection than  
207 samples from non-hospitalized patients. We did not have information on the number of

208 days post infection for any of the samples. As another way to probe the relationship  
209 between disease severity and minor variant richness, that is less likely to be related to  
210 infection duration, we examined minor variant diversity in samples from July 2021  
211 onwards when an appreciable number of vaccine breakthrough cases occurred.  
212 Assuming that vaccination was associated with less severe disease even among the  
213 population not requiring hospitalization, we compared minor variant richness in the  
214 infections of fully vaccinated and unvaccinated or partially vaccinated non-hospitalized  
215 individuals. At comparable Ct values, minor variant diversity was significantly higher ( $p$   
216  $<0.05$ ) in the unvaccinated than in the fully vaccinated cases (**Table 1b, Fig.2b**). Finally,  
217 we compared minor variant diversity in samples from healthcare workers undergoing

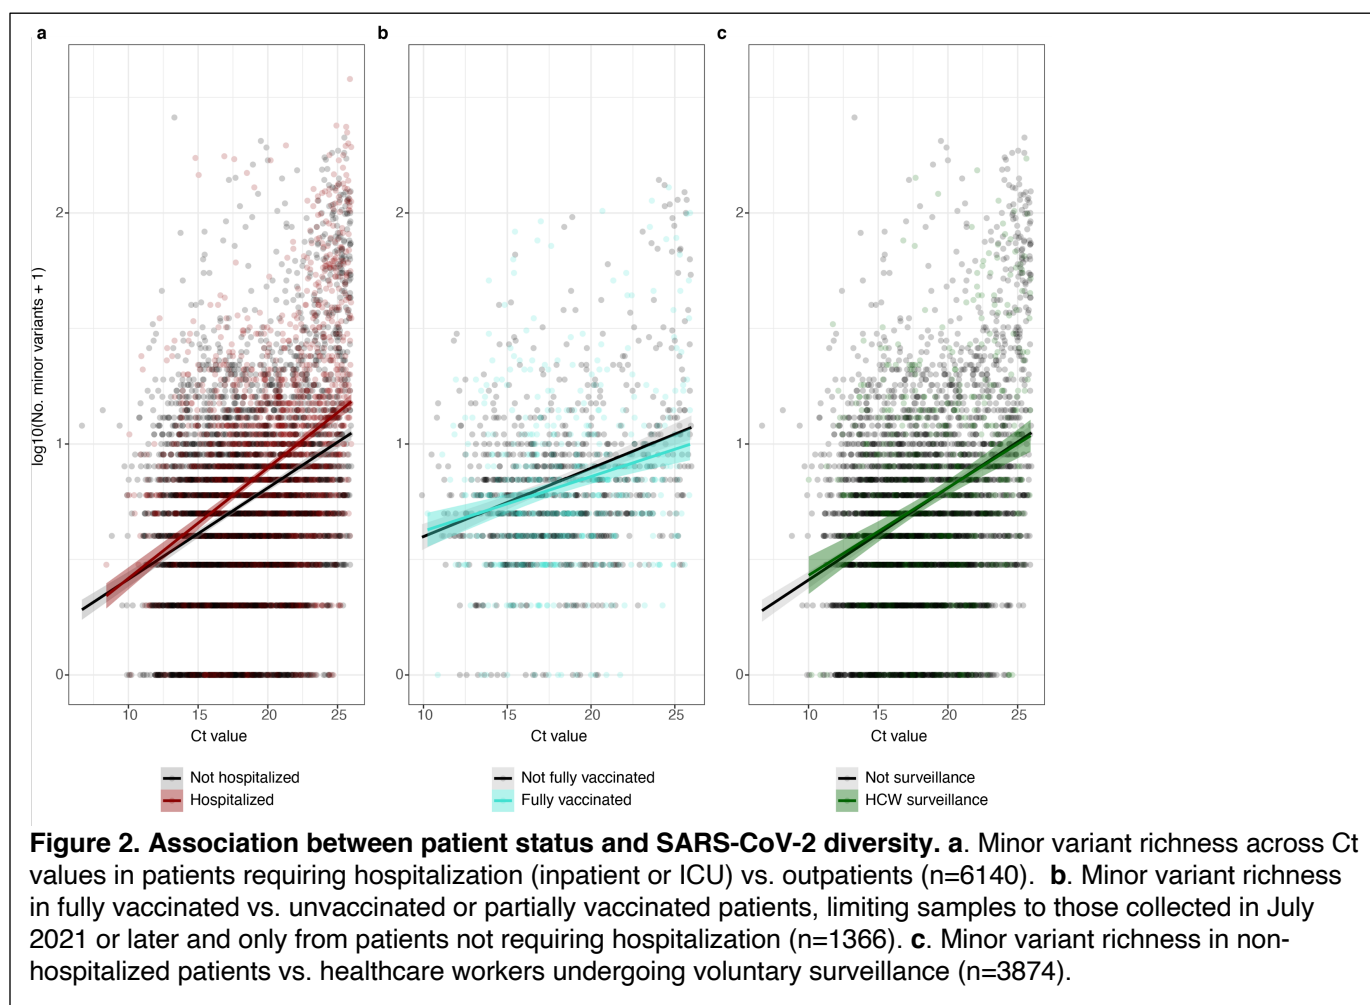

218 voluntary surveillance testing with samples from non-hospitalized patients. In this case,

219 minor variant richness was not significantly different between these two groups (**Table**  
220 **1c, Fig.2c**).

221  
222 As a complementary approach to evaluating the association between patient factors,  
223 sample characteristics, and minor variant richness, we constructed a LASSO regression  
224 model containing the comorbidities, treatments, and demographic factors, as well as Ct  
225 values, median sequencing depth, collection month and run. In the best model  
226 ( $\lambda=0.0013$ ) the deviance ratio was 0.226, meaning that the combination of  
227 variables we included explained approximately 22.6% of the variation in the log-  
228 transformed number of variants. We also constructed a version of this model which  
229 excluded all factors that had a strong temporal bias (vaccination status, consensus  
230 variant, and collection month), because temporal trends in this study design were  
231 impossible to separate from sequencing batch (run) effects. In this model (deviance  
232 ratio 0.17), hospital admission was clearly associated with the highest increase in minor  
233 variant richness (**SuppFig.5**).

234  
235 Taken together, these complementary modeling strategies suggest there is substantial  
236 unexplained variation in within-host minor variant richness. They also highlight that  
237 severity of disease—as exemplified here by hospitalization or lack of vaccination—  
238 warrants further study as a correlate of within-host diversity independently of diversity  
239 associated with viral load or viral-load-related technical artefacts.

240  
241 *Robustness of clinical associations to analytical thresholds*

242 To evaluate how sensitive the associations discussed above were to the criteria used to  
243 identify minor variants, we generated three additional datasets with different levels of  
244 stringency across criteria. In Alternate Dataset 1, we used samples with 200x coverage  
245 or more over at least 98% of the genome. We required minor variants to have a  
246 minimum of 2% allele frequency (MAF) at sites with at least 200x coverage and be  
247 supported by a minimum of 100 reads. In Alternate Dataset 2, we used samples with  
248 500x coverage or more over at least 98% of the genome, and required minor variants to

249 have at least 3% MAF supported by a minimum of 20 reads. In Alternate Dataset 3, we  
250 used samples with 1000x coverage or more over at least 98% of the genome and minor  
251 variants with at least 1% MAF. Because the sample size was significantly reduced, we  
252 relaxed the Ct criterion from  $Ct < 26$  to  $Ct < 35$  for the regression analyses on vaccination  
253 status and healthcare worker surveillance, on the assumption that random errors in  
254 higher Ct samples would not differ between the groups. Despite the varying sample  
255 sizes and minor variant detection limits, all three datasets showed significantly higher  
256 minor variant richness in hospitalized patients (**SuppFig.6**). This factor was the most  
257 important in all three random forest models, it was in the top three highest coefficients in  
258 all three LASSO regression models in which all factors were included, and it had the  
259 highest coefficient in all three LASSO models in which temporally-biased factors were  
260 excluded. The other two factors of interest – vaccination status and healthcare worker  
261 status – differed significantly in the extent of the association depending on the dataset  
262 used. Minor variant richness was significantly lower in vaccinated patients and in  
263 healthcare workers in Alternate Dataset 1, but only the healthcare worker factor was  
264 significant in Alternate Dataset 2, and neither factor was significant in alternate dataset  
265 3. The ROC AUC values for the random forest classification model were similar for all  
266 three datasets (0.58-0.60), while the fraction of variation explained by the LASSO  
267 regression model was slightly higher for alternate dataset 3 (28% for the model  
268 including all factors, 16% for the model excluding temporally biased factors). Aside from  
269 the hospitalization variable, the coefficients of many factors changed substantially  
270 between alternate datasets, even changing sign (for example, plasma treatment and  
271 monoclonal antibody treatment were associated with increased or decreased minor  
272 variant richness depending on the dataset). We concluded that the thresholds and  
273 criteria used to identify minor variants could significantly affect the strength of observed  
274 associations, but that the higher richness of minor variants in samples from patients  
275 requiring hospitalization was robust.

276

277 *Mutational patterns of highly prevalent minor variants*

278 Having determined that minor variant richness was robustly associated with  
 279 hospitalization, we set out to analyze the mutational patterns in the genome. Across all  
 280 samples, minor variants were found mostly concentrated in the Orf8 and N genes, an  
 281 observation consistent with previous characterization of these genes as  
 282 hypermutable<sup>18,19</sup> (**Fig.3a,b**); this enrichment pattern was similar in samples from  
 283 hospitalized and non-hospitalized patients (**SuppFig. 7**). The most common within-host  
 284 mutation observed was C>T, consistent with previous studies and with the hypothesis  
 285 that nucleic acid editing by host enzymes contributes to the mutational spectrum<sup>11</sup>  
 286 (**Fig.3c**). Surprisingly, C>T mutations were also the most prevalent among non-  
 287 reproducible minor variants, despite the fact that C>T mutations are not known to be  
 288 common sequencing errors<sup>20</sup> (**SuppFig. 8**).

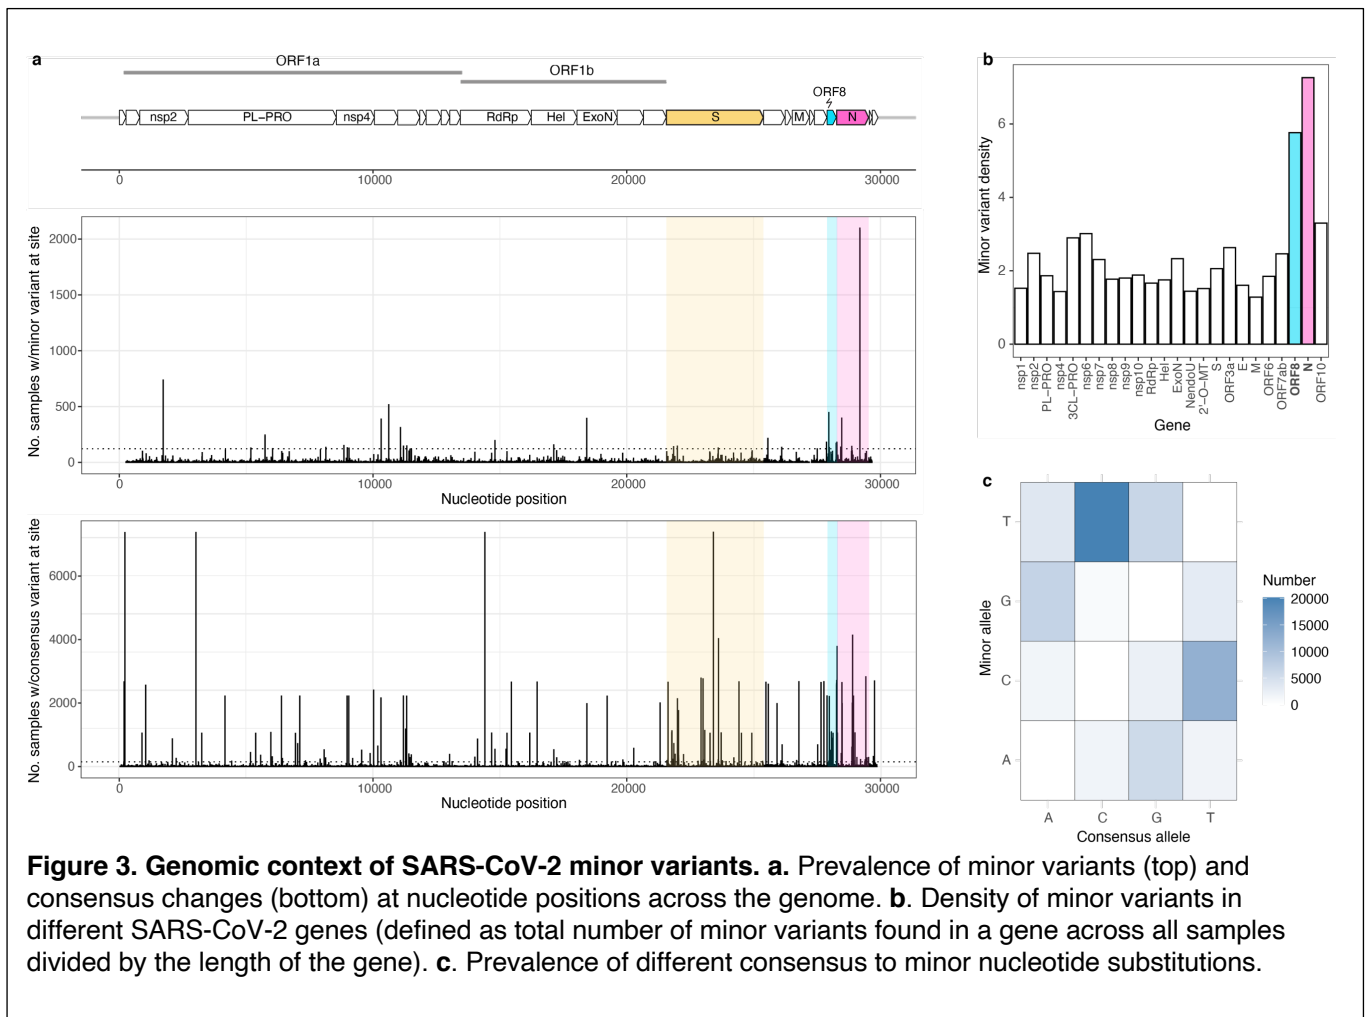

290 We were particularly interested in sites containing minor variants in a high proportion of  
291 the samples. Mutational hotspots are of interest due to their potentially important role in  
292 convergent evolution. Therefore, a plausible purpose for monitoring minor variants in  
293 deep sequencing data is to identify sites with increased probabilities of mutation as a  
294 special focus for targeted mutational analysis. Doing so would require the ability to  
295 distinguish genuine mutational hotspots from recurrent artefacts.

296  
297 We focused on 34 positions in the genome where minor variants were present in at  
298 least 2% of samples (**Fig.4a**). Minor variants at most of these positions were found at a  
299 range of frequencies from 1% to 50%, with several exceptions (**Fig.4b**). A majority of  
300 these sites included samples in which the minor variant was a reversion to the ancestral  
301 allele, suggesting repeated mutation at these sites. The gene containing the highest  
302 number (8) of highly recurrently mutated sites was N, but another 7 of these sites were  
303 found in the proteases PLpro or 3CLpro. These essential enzymes are involved in viral  
304 replication and immune modulation and thus high-profile targets for antiviral drug  
305 development<sup>21,22</sup>. This further justifies special attention to the mutational properties of  
306 these sites, since responsible development of antivirals ought to consider likely paths to  
307 the evolution of resistance, including loci with higher than average standing genetic  
308 variation within hosts. We cross-referenced the list of the 34 highly shared positions with  
309 highly shared sites from previous studies, with global patterns of consensus SNPs  
310 (queried from GISAID using cov-spectrum.org<sup>23</sup>), and with known phenotypically  
311 important convergent mutations<sup>24</sup>.

312  
313 Several of the highly shared minor variant sites were highly polymorphic on the  
314 consensus level both within this dataset and in the US-wide GISAID data. Such sites  
315 pose challenges for interpretation because this pattern could be indicative of genuinely  
316 hypermutable sites but is also difficult to distinguish from cross-contamination because  
317 multiple consensus variants are often present in the same run. Indeed, in many sites  
318 that were polymorphic on the consensus level, minor variants only appeared in runs in  
319 which multiple consensus variants were present (**SuppFig.9**). One exception was

320

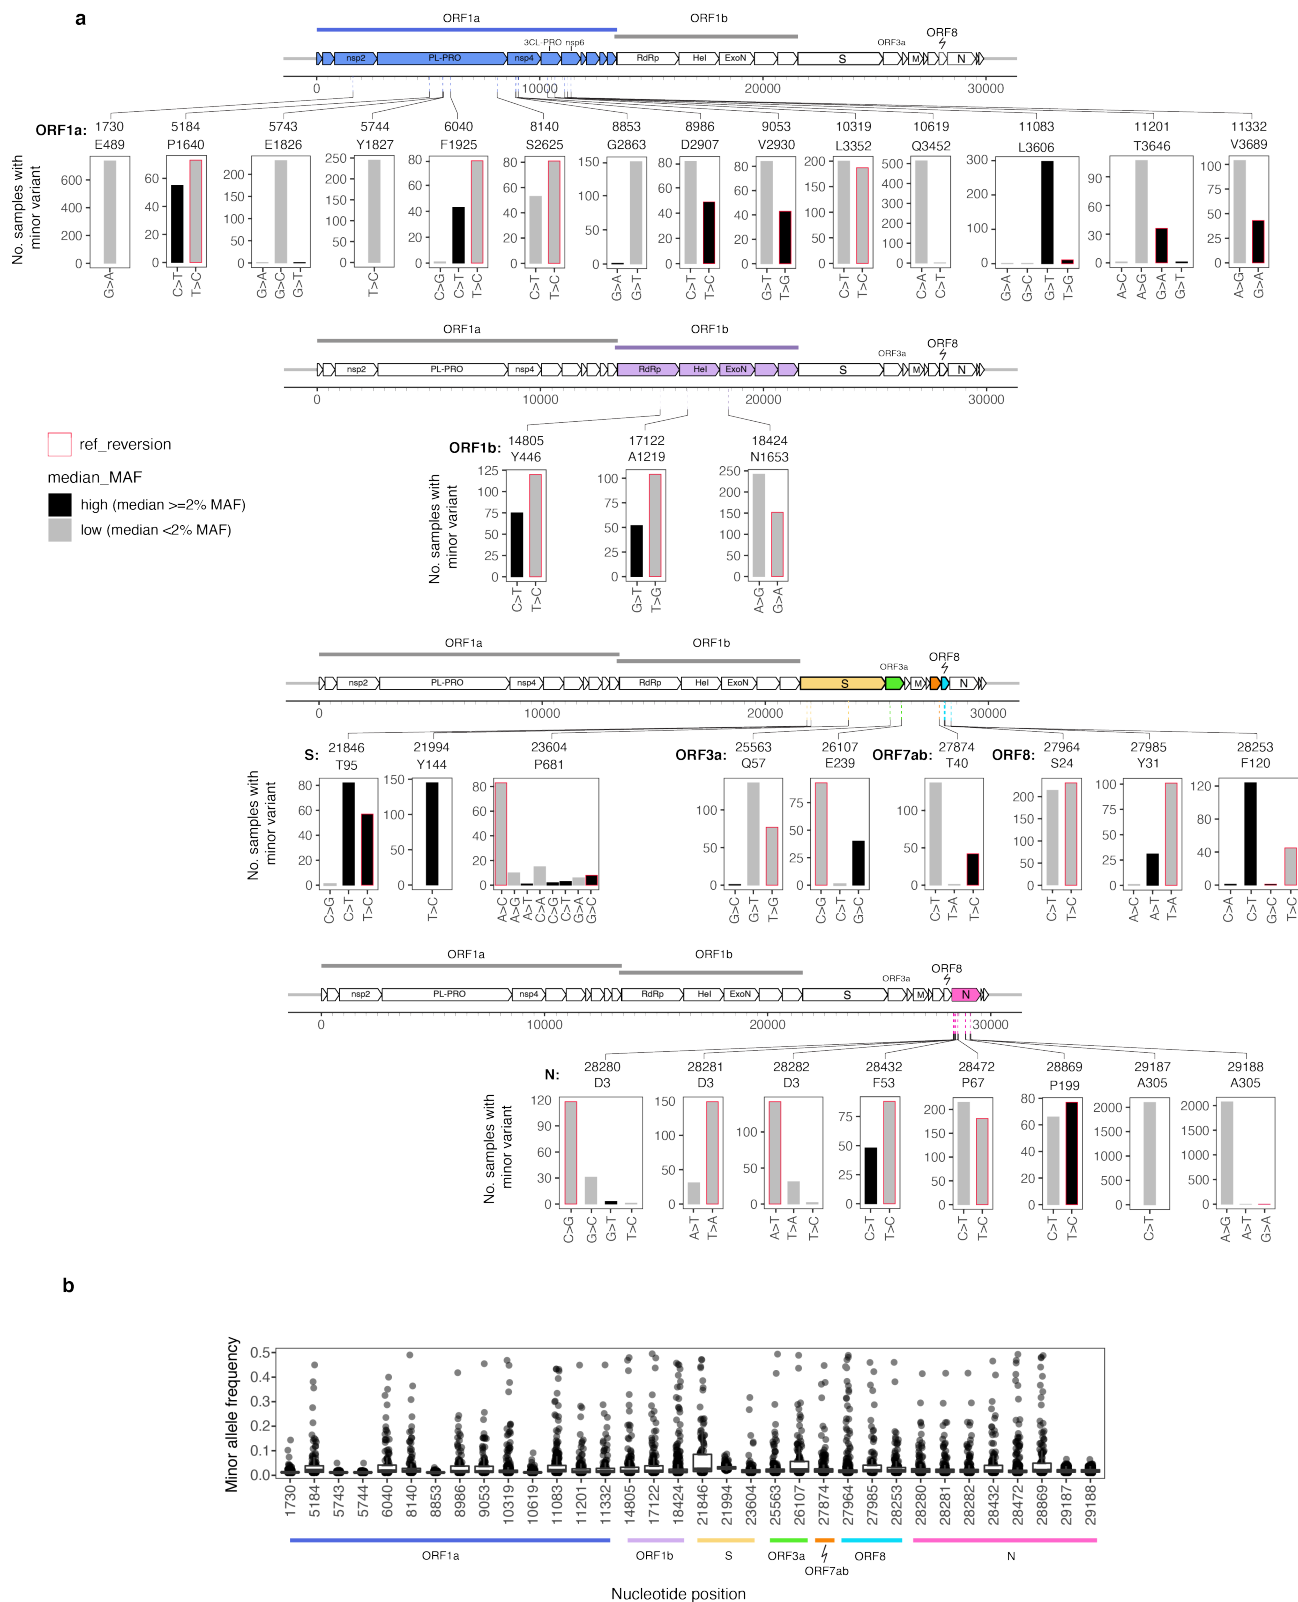

**Figure 4. Nucleotide substitutions and minor allele frequencies at highly mutable sites. a.** Minor variant changes at 34 nucleotide positions containing minor variants in at least 2% of samples. **b.** Minor allele frequencies of variants at these sites.

321 had all combinations of minor and consensus nucleotides present throughout the study  
322 period; and sites 28280-28282 (N: D3), which had two alleles at various frequencies  
323 present at each position in the codon throughout the study period. S: P681 has  
324 undergone different substitutions in multiple variants of concern; N: D3 contains a whole  
325 codon substitution in the Alpha lineage. These patterns are consistent with the  
326 explanation that these are highly mutable loci in which mutations have a high likelihood  
327 of becoming fixed in a lineage with a fitness advantage, like the variants of concern.

328  
329 A somewhat puzzling pattern was observed for the highly prevalent minor variants at  
330 sites 1730 (orf1a: E489), 8853 (orf1a: G2863), 10619 (orf1a: Q3452), and 29187-29188  
331 (N:A305) (**Fig.4a**). These sites were highly conserved at the consensus level but  
332 contained minor variants at low frequencies in a substantial fraction of specimens  
333 throughout the study period with a notable increase in the fraction of samples with minor  
334 variants in the later part of the study period (starting approximately with run 57/July  
335 2021) (**SuppFig.9**). This period corresponds to when the vast majority of sequenced  
336 specimens were from the Delta lineages.

337  
338 Some of the other sites had evidence suggesting technical or bioinformatic artefacts.  
339 For example, nucleotide position 11083 was identified as a highly recurrent minor  
340 variant in Lythgoe et al and Tonkin-Hill et al<sup>10,11</sup>, as well as a highly homoplastic site  
341 across the SARS-CoV-2 phylogeny<sup>25</sup>. It is immediately adjacent to a long T-  
342 homopolymer site, a well-known cause of sequencing error. Nucleotide position 21994  
343 (S:Y144) is adjacent to a characteristic deletion in the Alpha (B.1.1.7) lineage,  
344 suggesting that mis-alignment of reads at the deletion site might contribute to the  
345 appearance of minor variants at that position. A particularly anomalous pair of minor  
346 variant sites were at positions 29187 and 29188, in the N gene, which were present in  
347 more than 30% of the samples studied but never at higher than 7% minor allele  
348 frequency. The amino acid mutation that these minor variants corresponded to, N:  
349 A305V, was extremely rare on the consensus level among sequences deposited to



350 GISAID (**SuppFig.10**), with only 72 sequences containing this mutation found in the  
351 United States, of which 59 were from Houston Methodist Hospital.

352  
353 Finally, as another approach to examining whether convergent evolution could be linked  
354 to mutational patterns observed in minor variant data, we examined the frequency in the  
355 minor variant dataset of mutations repeatedly associated with increases in SARS-CoV-2  
356 fitness. Obermeyer et al<sup>24</sup> showed that single nucleotide mutations associated with  
357 increased transmissibility evolved independently multiple times in different lineages.  
358 Several mutations in the Spike protein, namely E484K, N501Y, K417N, and L18F, also  
359 independently evolved in several lineages of concern<sup>26</sup>. We examined the prevalence of  
360 these 22 nucleotide substitutions as minor variants in our data. Eight of these were not  
361 found as minor variants in any samples, whereas 14 (13 of them in the Spike protein)  
362 were found in at least one sample (**SuppFig.11**). The most prevalent of these minor  
363 variant mutations was S:T95I, which was at nucleotide position 21846, one of the  
364 identified highly shared sites. This mutation, in the N-terminal domain of the Spike  
365 protein, has arisen independently in at least 30 consensus lineages and is associated  
366 with significant increases in viral fitness, but its phenotypic effect has not, to our  
367 knowledge, been experimentally characterized. Given the tendency of this mutation to  
368 frequently arise both within hosts and be successfully transmitted between hosts, further  
369 characterization of the effects of this change may be warranted to inform design of  
370 drugs and antibodies.

## 371 372 **Discussion**

373 We explored the feasibility of characterizing within-host diversity by extracting minor  
374 variants data from clinical genomic surveillance samples of a large, densely sampled  
375 population to supplement consensus-level understanding of viral variants. The clearest  
376 finding of this study is that although within-host diversity is generally low, higher within-  
377 host diversity is associated with patients requiring hospitalization. Previous studies of  
378 minor variants in SARS-CoV-2 have consistently identified outlier samples with high  
379 numbers of within-host minor variants even after stringent quality control but were

380 unable to examine the implications of such specimens due to their rarity. Exactly such  
381 rare events (i.e. patients with highly diverse viral populations) may be disproportionate  
382 drivers of viral recombination and transmission of standing genetic variation on which  
383 host-mediated natural selection can act. In this dataset, the absolute number of these  
384 outliers was high enough that we could test whether any of the host factors were  
385 associated with higher viral diversity.

386  
387 Every novel consensus variant must at some point arise as a within-host variant, so it is  
388 crucial to understand what contexts may be likely to incubate viral population diversity.  
389 We found that, despite the noise introduced by variation in sequencing runs and sample  
390 Ct values, the signal was strong enough to observe a clear correlation between higher  
391 minor variant richness in more severely ill patients (those admitted to inpatient care or  
392 the ICU) and lower richness in vaccinated patients, in whom the number of replication  
393 cycles is assumed to be constrained. Previously, similar observations had been hinted  
394 at in smaller studies comparing cancer patients with healthcare workers, comparing  
395 mildly and severely ill patients, and examining minor variants in samples from patients  
396 of different ages<sup>27–29</sup>. Studies in which patients were longitudinally sampled have  
397 shown fluctuating numbers of minor variants over time, with little directional trend<sup>9,30</sup>.  
398 Combined with our data, this suggests that within-host diversity is temporally dynamic,  
399 but in the aggregate is more likely to be high in more severely ill patients. This has  
400 implications for infection control strategies, for example bolstering the case that  
401 transmission control in healthcare settings and among symptomatically infected patients  
402 should be a critically high priority for preventing the emergence of new viral variants.

403  
404 The direction of causality for the association between severe disease and high within-  
405 host diversity is unclear. It is plausible that more severe disease is the result of a more  
406 prolonged or quickly-replicating infection, during which more mutations can  
407 accumulate<sup>31</sup>; but, conversely, it is possible that more diverse infections drive more  
408 severe disease<sup>32</sup>. It is also possible that the immune responses during severe disease  
409 are distinctive in ways that affect selection on the viral population, or that there are

410 mechanistic links between the comorbidities associated with risk of hospitalization and  
411 the dynamics of immune selection. For example, obesity is associated with more  
412 negative outcomes in influenza, and a study of influenza virus diversity in mice found  
413 that influenza A virus replicated faster and accumulated more diversity in obese than in  
414 lean mice, an effect that appeared to be mediated by the differential robustness of the  
415 interferon response<sup>33</sup>. Future studies should conduct case-control comparisons of  
416 technically replicated longitudinal samples of patients with different disease time-  
417 courses to understand how virus population diversity changes over time in different  
418 types of hosts, under different immunological and clinical conditions. Such dynamics are  
419 well understood in viruses such as HIV, but may be more complex in SARS-CoV-2,  
420 which appears to elicit highly heterogeneous immune responses in different patients<sup>34</sup>.

421  
422 In multiple previous studies of SARS-CoV-2 within-host diversity, mutational hotspots  
423 have hampered attempts to use minor variants to track transmission of closely related  
424 lineages<sup>11,35</sup>, since it is difficult to distinguish hypermutable sites, recurrent artefacts,  
425 and sites that are genuinely co-transmitted. Notably, in Tonkin-Hill et al, there was no  
426 correlation between the probability of transmission between two patients and the  
427 number of minor variants they shared; samples that were epidemiologically distant from  
428 each other often had more than 10 minor variants in common. This was true even after  
429 excluding minor variants that were generally highly prevalent in the dataset. Other  
430 authors have pointed out that automatically excluding minor variants that are present in  
431 many samples is not always warranted in epidemiological inference, for example when  
432 examining a superspreading event in which a large group of people were interacting  
433 and transmitting virus for a substantial length of time<sup>35</sup>. In general, it appears that  
434 convergent within-host *de novo* mutation is common enough to significantly complicate  
435 inferences of transmission of within-host diversity. For these reasons, it was warranted  
436 to play closer attention to the characteristics of sites containing minor variants in many  
437 samples. We found evidence both for highly recurrent artefacts and for phenotypically  
438 important recurrent mutations, the latter of which may be a high priority for targeted  
439 mutational studies.

440

441 Our observations suggest that identifying genuine mutational hotspots requires both  
442 understanding the genomic context (noting adjacent deletions, homopolymers or other  
443 structural features that might affect spurious minor variant calling) and also the wider  
444 sequencing context. For example, the increase in the prevalence of several mutations in  
445 the same later runs is difficult to explain. Although it is plausible that different lineages  
446 would have different within-host mutation rates, it is more difficult to imagine a  
447 mechanism by which certain lineages would have elevated rates of mutation only at  
448 specific sites. It is also difficult to rule out that some unknown technical change in  
449 sequencing conditions also contributed to changes in relative prevalence at these sites.  
450 Similarly, we suspect that the high prevalence of minor variants at sites 29187-29188  
451 may be an artefact of the specific combination of methods used at this sequencing  
452 facility, because consensus variants at this position were very rare in consensus  
453 sequences from GISAID and primarily came from Houston Methodist, in samples with  
454 very different genetic backgrounds and collection dates. The existence of consensus  
455 mutations specific to particular sequencing labs was noted early in the pandemic<sup>25</sup>, so  
456 caution when detecting unusual mutations on the minor variant level is particularly  
457 warranted.

458

459 One of the purposes of this study was to examine the general feasibility of extracting  
460 minor variant data from samples not collected for this purpose. Despite the exceptional  
461 level of quality control involved in the generation of our sequences in the clinical  
462 context, we found that unavoidable technical artefacts, in particular batch effects and  
463 the clear effect of RNA input quantity on minor variant calling—even when limiting  
464 samples to those with high coverage across the genome—hampered the ability to draw  
465 definitive conclusions in the absence of technical replicates and required us to limit our  
466 analyses to high input samples. Our results demonstrate that caution is required when,  
467 for example, analyzing minor variants from sequence data repositories<sup>36,37</sup>. Rates of  
468 different types of error may meaningfully differ between batches of samples such as  
469 sequencing runs, between laboratory protocols and even due to factors such as

470 whether individual tubes or plates were used in library preparation <sup>38,39</sup>. If the  
471 idiosyncratic physical conditions under which library preparation occurs differentially  
472 affect error rates, then developing universally applicable error models may be extremely  
473 difficult. At the same time, the composition of batches may be non-random in  
474 biologically meaningful ways (e.g. samples from an outbreak in a particular location or  
475 population are likely to be sequenced in the same batch), making it difficult to  
476 disentangle biological and technical causes of patterns of minor variant prevalence.  
477 These results show that, without the development of more mature methods for  
478 correcting for numerous different sources of technical noise, deep sequence data  
479 cannot be used for routine monitoring of within-host viral diversity in the same way that  
480 consensus sequences are used for genomic surveillance.

481  
482 Targeted studies of within-host diversity that take these technical issues into account  
483 can, however, lead to a greater understanding of the mutational biases of the virus and  
484 characteristics of the within-patient environment that affect viral diversification. In our  
485 exploratory study, the clearest emergent signal is that infections with high virus diversity  
486 are enriched among hospitalized patients. This has clear implications for prioritizing  
487 transmission control in healthcare settings and Further dissection of within-host viral  
488 dynamics is required to determine whether knowledge of a patient's viral population  
489 diversity can better inform clinical care.

490

## 491 **Methods**

492

### 493 *Patient population and ethics*

494 The work was approved by the Houston Methodist Research Institute Institutional  
495 Review Board (IRB1010-0199). Specimens from patients were obtained primarily from  
496 symptomatic patients with a suspicion for COVID-19 disease from outpatient,  
497 emergency, labor and delivery, and other types of clinics. Specimens from healthcare  
498 workers were collected as part of a non-mandatory workplace surveillance program.  
499 Specimens were tested in the Molecular Diagnostics Laboratory at Houston Methodist

500 Hospital using assays granted Emergency Use Authorization (EUA) from the FDA  
501 ([https://www.fda.gov/medical-devices/emergency-situations-medical-devices/faqs-](https://www.fda.gov/medical-devices/emergency-situations-medical-devices/faqs-diagnostic-testing-sars-cov-2#offeringtests)  
502 [diagnostic-testing-sars-cov-2#offeringtests](https://www.fda.gov/medical-devices/emergency-situations-medical-devices/faqs-diagnostic-testing-sars-cov-2#offeringtests), last accessed June 7, 2021). Standardized  
503 specimen collection methods were used (<https://vimeo.com/396996468/2228335d56>).  
504 Multiple molecular testing platforms were used, including the COVID-19 test or RP2.1  
505 test with BioFire Film Array instruments, the Xpert Xpress SARS-CoV-2 test using  
506 Cepheid GeneXpert Infinity or Cepheid GeneXpert Xpress IV instruments, the Cobas  
507 SARS-CoV-2 & Influenza A/B Assay using the Roche Liat system, the SARS-CoV-2  
508 Assay using the Hologic Panther instrument, the Aptima SARS-CoV-2 Assay using the  
509 Hologic Panther Fusion system, the Cobas SARS-CoV-2 test using the Roche 6800  
510 system, and the SARS-CoV-2 assay using Abbott Alinity instruments.

511

#### 512 *Library preparation and sequencing*

513 Libraries for whole SARS-CoV-2 genome sequencing were prepared according to  
514 version 3 (<https://community.artic.network/t/sars-cov-2-version-4-scheme-release/312>,  
515 last accessed August 19, 2021) of the ARTIC nCoV-2019 sequencing protocol. We  
516 used a semi-automated workflow described previously<sup>6,7</sup> that employed BioMek i7 liquid  
517 handling workstations (Beckman Coulter Life Sciences) and MANTIS automated liquid  
518 handlers (FORMULATRIX). Short sequence reads were generated with a NovaSeq  
519 6000 instrument (Illumina).

520

#### 521 *Sample selection*

522 The initial dataset was comprised of 39,880 samples from 70 Novaseq runs. These runs  
523 also often contained samples from other institutions or collection time periods, which we  
524 took into account when assessing the possibility of within-run cross-contamination but  
525 did not otherwise analyze. Median sequence depth of samples was broadly but not  
526 perfectly correlated with sample input quantity. We noted that very low input samples,  
527 i.e. with Ct values  $\geq 40$ , generally had very low coverage, but there was a small subset  
528 with high coverage comparable to high input samples (**SuppFig.12**). We excluded from  
529 the analysis any runs containing at least three Ct  $\geq 40$  samples in which the coverage

530 breadth and depth were not statistically different from the Ct<40 samples in the run (t-  
531 test>0.01 for median coverage or for fraction of genome with at least 1000x coverage).  
532 We further limited all our analyses to samples with at least 100x coverage over at least  
533 98% of the genome excluding the 5' and 3' UTRs. We also excluded samples where the  
534 consensus sequence was flagged as poor quality under the default quality control  
535 criteria of Nextclade<sup>15</sup> (QC score >100) or that did not have a lineage assigned by  
536 Pango<sup>16</sup>. In cases where multiple samples were collected longitudinally from the same  
537 patient, we chose the earliest sample.

538

### 539 *Consensus sequence assembly and minor variant calling*

540 Adapter sequences were trimmed from reads using trimmomatic v0.39<sup>40</sup> with the  
541 following options: ILLUMINACLIP:\${params.adapters}:2:30:10:8:true LEADING:20  
542 TRAILING:20 SLIDINGWINDOW:4:20 MINLEN:20. Reads were aligned to the  
543 Wuhan/Hu-1 SARS-CoV2 genome (RefSeq: NC\_045512.2) using minimap2 v2.17 with  
544 the preset genomic short-read mapping option<sup>41</sup>. ARTIC v3 primer sequences<sup>42</sup> were  
545 removed using iVar v.1.3.1 with a minimum quality threshold of 0 and including all reads  
546 with no primer sequences found<sup>43</sup>. Consensus sequences and minor variants were  
547 called using an in-house variant calling pipeline, timo, available at  
548 <https://github.com/GhediniLab/timo>.

549

### 550 *Analysis*

551 Calculations, visualizations and statistical analyses were carried out in R v4.0.3 (R  
552 Foundation for Statistical Computing). Packages used for analysis included tidyverse  
553 1.3.1<sup>44</sup>, glmnet 4.1.2<sup>45</sup>, nlme 3.1.149<sup>46</sup>, randomForest 4.6.14<sup>47</sup>, pROC 1.17.0.1.  
554 Consensus sequence quality control was carried out in Nextclade 1.4.1<sup>15</sup>.

555

### 556 *Additional Data Files*

557 Inclusion\_table.csv includes IDs of samples with information about which samples were  
558 included in which analyses, and will include SRA accession numbers for each sample

559 when data deposition is complete. Files used in minor variant analysis are available in  
560 Github repository <https://github.com/GhedinSGS/HMH-SARS-CoV2-minorvariants>.

561

### 562 *Sequence and code availability*

563 Raw sequence data are available under Bioproject PRJNA767338. Pipeline used for  
564 minor variant calling is available at <https://github.com/GhedinLab/timo>, and data files  
565 and code used for analyses are available at [https://github.com/GhedinSGS/HMH-](https://github.com/GhedinSGS/HMH-SARS-CoV2-minorvariants)  
566 [SARS-CoV2-minorvariants](https://github.com/GhedinSGS/HMH-SARS-CoV2-minorvariants).

567

### 568 *Acknowledgements*

569 We thank Drs. Marc Boom and Dirk Sostman for their ongoing support. We thank  
570 Matthew Ojeda Saavedra, Kristina Reppond, Madison N Shyer, Jessica Cambric,  
571 Ryan Gadd, Rashi M Thakur, Akanksha Batajoo, Regan Mangham, Sindy Pena and  
572 Trina Trinh for technical support. The research was supported by the Houston Methodist  
573 Academic Institute Infectious Diseases Fund and many generous Houston  
574 philanthropists. This work utilized the computational resources of the NIH High  
575 Performance Computing (HPC) Biowulf cluster (<http://hpc.nih.gov>).

576

### 577 *Funding Statement*

578 This project was supported in part by the Houston Methodist Academic Institute  
579 Infectious Diseases Fund, and federal funds from the National Institute of Allergy and  
580 Infectious Diseases, National Institutes of Health, Department of Health and Human  
581 Services, under Contract No. 75N93019C00076 (J.J.D.). This work was also supported  
582 in part by the Division of Intramural Research (DIR) of the NIAID/NIH.

583

584



585 **TABLE 1. Linear mixed-effects models for association of hospitalization,**  
586 **vaccination and healthcare worker surveillance samples on minor variant**  
587 **richness.**

588 a. Effect of sample Ct value and patient hospitalization status on log10 transformed  
589 minor variant richness. Sequencing run is included as a random effect.

|                      | <b>numDF</b> | <b>denDF</b> | <b>F-value</b> | <b>p-value</b> |
|----------------------|--------------|--------------|----------------|----------------|
| (Intercept)          | 1            | 6090         | 602.4491       | <.0001         |
| Ct                   | 1            | 6090         | 1370.695       | <.0001         |
| admitted_hospital    | 1            | 6090         | 77.6004        | <.0001         |
| Ct:admitted_hospital | 1            | 6090         | 11.5969        | 7.00E-04       |

590

591 b. Effect of sample Ct value and patient vaccination status on log10 transformed  
592 minor variant richness. Only samples from non-hospitalized patients collected in  
593 July 2021 or later are included. Sequencing run is included as a random effect.

|                   | <b>numDF</b> | <b>denDF</b> | <b>F-value</b> | <b>p-value</b> |
|-------------------|--------------|--------------|----------------|----------------|
| (Intercept)       | 1            | 1346         | 297.22177      | <.0001         |
| Ct                | 1            | 1346         | 152.42258      | <.0001         |
| vaccine_status    | 1            | 1346         | 4.52737        | 0.0335         |
| Ct:vaccine_status | 1            | 1346         | 4.31531        | 0.0380         |

594

595 c. Effect of sample Ct value and healthcare worker surveillance sample status on  
596 log10 transformed minor variant richness. Only samples from non-hospitalized  
597 individuals are included. Sequencing run is included as a random effect.

|                        | <b>numDF</b> | <b>denDF</b> | <b>F-value</b> | <b>p-value</b> |
|------------------------|--------------|--------------|----------------|----------------|
| (Intercept)            | 1            | 3824         | 455.9225       | <.0001         |
| Ct                     | 1            | 3824         | 669.4242       | <.0001         |
| surveillance_sample    | 1            | 3824         | 0.1950         | 0.6588         |
| Ct:surveillance_sample | 1            | 3824         | 0.0207         | 0.8857         |

598

599

600 **FIGURE LEGENDS**

601 **Figure 1. Distribution of minor variant richness in Houston Methodist SARS-CoV-**

602 **2 specimens. a.** Change in distribution of sample Ct values after applying minimum

603 sequencing depth and background contamination exclusion criteria (see Methods).

604 **b.** Number of minor variants per sample in 15,389 samples passing initial quality control

605 criteria (minimum depth/breadth of coverage, run-level quality screening, consensus

606 sequence assembly quality). **c.** Relationship between minor variant richness and

607 sample input quantity (qPCR Ct value) in samples for which Ct values were available

608 (n=7356). Vertical dotted line represents Ct<26, the threshold below which minor

609 variants are generally reproducible.

610

611 **Figure 2. Association between patient status and SARS-CoV-2 diversity. a.** Minor

612 variant richness across Ct values in patients requiring hospitalization (inpatient or ICU)

613 vs. outpatients (n=6140). **b.** Minor variant richness in fully vaccinated vs. unvaccinated

614 or partially vaccinated patients, limiting samples to those collected in July 2021 or later

615 and only from patients not requiring hospitalization (n=1366). **c.** Minor variant richness

616 in non-hospitalized patients vs. healthcare workers undergoing voluntary surveillance

617 (n=3874).

618

619 **Figure 3. Genomic context of SARS-CoV-2 minor variants. a.** Prevalence of minor

620 variants (top) and consensus changes (bottom) at nucleotide positions across the

621 genome. **b.** Density of minor variants in different SARS-CoV-2 genes (defined as total

622 number of minor variants found in a gene across all samples divided by the length of the

623 gene). **c.** Prevalence of different consensus to minor nucleotide substitutions.

624

625 **Figure 4. Nucleotide substitutions and minor allele frequencies at highly mutable**

626 **sites. a.** Minor variant changes at 34 nucleotide positions containing minor variants in at

627 least 2% of samples. **b.** Minor allele frequencies of variants at these sites.

628

629

630 **Supplemental Figures**

631

632 **Supplementary Figure 1. Reproducibility of minor variants in 54 samples with**  
633 **technical replicates. a,b.** Reproducibility of minor variant detection (black vs. red) and  
634 minor allele frequency in samples with different input quantities, by category and by  
635 individual samples. “Unknown” Ct values represent samples diagnosed on the Hologic  
636 Aptima instrument, which gives results in relative light units (values >100 in individual  
637 sample panels) or on the Biofire Diagnostics instrument, which does not quantify viral  
638 load (“NA” in individual sample panels). **c.** Minor variant reproducibility in samples with  
639 different ranges of median sequencing depth. **d.** Sequencing depth at site and minor  
640 allele frequency of minor variants that were subsequently detected in the second  
641 technical replicate (“yes”) vs. not detected (“no”).

642

643 **Supplementary Figure 2. Collection dates and consensus virus lineage of final**  
644 **sample set.**

645

646 **Supplementary Figure 3. Run-level effects on minor variant richness in filtered**  
647 **sample set. a.** Minor variant richness in high coverage and Ct<26 samples in each  
648 sequencing run. **b.** Relationship between sample’s median sequencing coverage and  
649 number of minor variants. **c.** Median number of minor variants for samples in each run  
650 represented as a function of run–level median of median coverage.

651

652 **Supplementary Figure 4. Categories of minor variant diversity among hospitalized**  
653 **and non-hospitalized patients.**

654

655 **Supplementary Figure 5. LASSO regression coefficients for association of patient**  
656 **and sample factors of interest with minor variant richness. a.** Results of model in  
657 which all factors of interest are included. **b.** Results of model in which factors with a  
658 strong temporal dimension were excluded (collection month, consensus lineage,  
659 vaccination status).

660

661 **Supplementary Figure 6. Associations between patient status and SARS-CoV-2**  
662 **diversity in three datasets using different thresholds for sample coverage and**  
663 **minor variant detection.**

664

665 **Supplementary Figure 7. Density of minor variants in different SARS-CoV-2 genes**  
666 **in samples from hospitalized and non-hospitalized patients.** Minor variant density is  
667 defined as total number of minor variants found in a gene across all samples divided by  
668 the length of the gene.

669

670 **Supplementary Figure 8.** Prevalence of different consensus > minor nucleotide  
671 substitutions at minor variant sites that were detected vs. not detected in a second  
672 sequencing replicate.

673

674 **Supplementary Figure 9. Prevalence of minor alleles and consensus alleles at the**  
675 **34 most frequent minor variant sites, by run.** For consensus allele prevalence, all  
676 samples from the run are included, regardless of whether they were analyzed in the  
677 minor variant study, on the assumption that they may contribute to cross-contamination  
678 in other samples.

679

680 **Supplementary Figure 10. Minor variant prevalence in the Houston Methodist**  
681 **dataset vs. prevalence of consensus mutations at these sites in US-wide SARS-**  
682 **CoV-2 sequences from GISAID.** GISAID sequences were queried on June 13, 2022  
683 covering the entire length of the pandemic in the U.S. to identify the number of  
684 sequences that had any nucleotide substitution (A,C,T,G) at the 34 nucleotide positions  
685 that most frequently had minor variants in the Houston dataset.

686

687 **Supplementary Figure 11. Prevalence across time of minor variants**  
688 **corresponding to recurrent amino acid changes associated with increased SARS-**  
689 **CoV-2 fitness, as identified in Obermeyer et al<sup>24</sup>.**

690

691 **Supplementary Figure 12. Sequencing depth and Ct values of Houston Methodist**  
692 **SARS-CoV-2 samples prior to filtering.**

693

694

695

696

697 **References**

698

699 1. du Plessis, L. *et al.* Establishment and lineage dynamics of the SARS-CoV-2

700 epidemic in the UK. *Science* eabf2946 (2021) doi:10.1126/science.abf2946.

701 2. Grubaugh, N. D. *et al.* An amplicon-based sequencing framework for accurately

702 measuring intrahost virus diversity using PrimalSeq and iVar. *Genome Biol.* **20**, 8

703 (2019).

704 3. Worby, C. J., Lipsitch, M. & Hanage, W. P. Shared Genomic Variants: Identification

705 of Transmission Routes Using Pathogen Deep-Sequence Data. *Am. J. Epidemiol.*

706 **186**, 1209–1216 (2017).

707 4. The CITIID-NIHR BioResource COVID-19 Collaboration *et al.* SARS-CoV-2

708 evolution during treatment of chronic infection. *Nature* **592**, 277–282 (2021).

709 5. Roder, Ae. *et al.* Diversity and selection of SARS-CoV-2 minority variants in the

710 early New York City outbreak.

711 <http://biorxiv.org/lookup/doi/10.1101/2021.05.05.442873> (2021)

712 doi:10.1101/2021.05.05.442873.

713 6. Long, S. W. *et al.* Sequence Analysis of 20,453 Severe Acute Respiratory Syndrome

714 Coronavirus 2 Genomes from the Houston Metropolitan Area Identifies the

715 Emergence and Widespread Distribution of Multiple Isolates of All Major Variants of

716 Concern. *Am. J. Pathol.* **191**, 983–992 (2021).

717 7. Olsen, R. J. *et al.* Trajectory of Growth of Severe Acute Respiratory Syndrome

718 Coronavirus 2 (SARS-CoV-2) Variants in Houston, Texas, January through May

- 719 2021, Based on 12,476 Genome Sequences. *Am. J. Pathol.* **191**, 1754–1773  
720 (2021).
- 721 8. Christensen, P. A. *et al.* Signals of Significantly Increased Vaccine Breakthrough,  
722 Decreased Hospitalization Rates, and Less Severe Disease in Patients with  
723 Coronavirus Disease 2019 Caused by the Omicron Variant of Severe Acute  
724 Respiratory Syndrome Coronavirus 2 in Houston, Texas. *Am. J. Pathol.*  
725 S000294402200044X (2022) doi:10.1016/j.ajpath.2022.01.007.
- 726 9. Valesano, A. L. *et al.* Temporal dynamics of SARS-CoV-2 mutation accumulation  
727 within and across infected hosts. *PLOS Pathog.* **17**, e1009499 (2021).
- 728 10. Lythgoe, K. A. *et al.* SARS-CoV-2 within-host diversity and transmission. *Science*  
729 eabg0821 (2021) doi:10.1126/science.abg0821.
- 730 11. Tonkin-Hill, G. *et al.* Patterns of within-host genetic diversity in SARS-CoV-2. *eLife*  
731 **10**, e66857 (2021).
- 732 12. Braun, K. M. *et al.* Acute SARS-CoV-2 infections harbor limited within-host diversity  
733 and transmit via tight transmission bottlenecks. *PLOS Pathog.* **17**, e1009849 (2021).
- 734 13. Storz, J. F. *et al.* The role of mutation bias in adaptive molecular evolution: insights  
735 from convergent changes in protein function. 1.
- 736 14. Stoltzfus, A. & Yampolsky, L. Y. Climbing Mount Probable: Mutation as a Cause of  
737 Nonrandomness in Evolution. *J. Hered.* **100**, 637–647 (2009).
- 738 15. Hadfield, J. *et al.* Nextstrain: real-time tracking of pathogen evolution. *Bioinformatics*  
739 **34**, 4121–4123 (2018).

- 740 16. O'Toole, Á. *et al.* Assignment of Epidemiological Lineages in an Emerging Pandemic  
741 Using the Pangolin Tool. *Virus Evol.* veab064 (2021) doi:10.1093/ve/veab064.
- 742 17. Ortiz, A. T. *et al.* *Within-host diversity improves phylogenetic and transmission*  
743 *reconstruction of SARS-CoV-2 outbreaks.*  
744 <http://biorxiv.org/lookup/doi/10.1101/2022.06.07.495142> (2022)  
745 doi:10.1101/2022.06.07.495142.
- 746 18. Zinzula, L. Lost in deletion: The enigmatic ORF8 protein of SARS-CoV-2. *Biochem.*  
747 *Biophys. Res. Commun.* **538**, 116–124 (2021).
- 748 19. Lin, M. J. *et al.* Host–pathogen dynamics in longitudinal clinical specimens from  
749 patients with COVID-19. *Sci. Rep.* **12**, 5856 (2022).
- 750 20. Stoler, N. & Nekrutenko, A. Sequencing error profiles of Illumina sequencing  
751 instruments. *NAR Genomics Bioinforma.* **3**, lqab019 (2021).
- 752 21. Rut, W. *et al.* Activity profiling and crystal structures of inhibitor-bound SARS-CoV-2  
753 papain-like protease: A framework for anti-COVID-19 drug design. *Sci. Adv.* **6**,  
754 eabd4596 (2020).
- 755 22. Shin, D. *et al.* Papain-like protease regulates SARS-CoV-2 viral spread and innate  
756 immunity. *Nature* **587**, 657–662 (2020).
- 757 23. Chen, C. *et al.* CoV-Spectrum: analysis of globally shared SARS-CoV-2 data to  
758 identify and characterize new variants. *Bioinformatics* **38**, 1735–1737 (2022).
- 759 24. Obermeyer, F. *et al.* Analysis of 6.4 million SARS-CoV-2 genomes identifies  
760 mutations associated with fitness. *Science* abm1208 (2022)  
761 doi:10.1126/science.abm1208.



- 762 25. de Maio, N. *et al.* Issues with SARS-CoV-2 sequencing data.
- 763 26. Martin, D. P. *et al.* The emergence and ongoing convergent evolution of the SARS-  
764 CoV-2 N501Y lineages. *Cell* S0092867421010503 (2021)  
765 doi:10.1016/j.cell.2021.09.003.
- 766 27. Siqueira, J. D. *et al.* SARS-CoV-2 genomic and quasispecies analyses in cancer  
767 patients reveal relaxed intrahost virus evolution.  
768 <http://biorxiv.org/lookup/doi/10.1101/2020.08.26.267831> (2020)  
769 doi:10.1101/2020.08.26.267831.
- 770 28. Al Khatib, H. A. *et al.* Within-Host Diversity of SARS-CoV-2 in COVID-19 Patients  
771 With Variable Disease Severities. *Front. Cell. Infect. Microbiol.* **10**, 575613 (2020).
- 772 29. Kuipers, J. *et al.* Within-patient genetic diversity of SARS-CoV-2.  
773 <http://biorxiv.org/lookup/doi/10.1101/2020.10.12.335919> (2020)  
774 doi:10.1101/2020.10.12.335919.
- 775 30. Simons, L. M. *et al.* Assessment of Virological Contributions to COVID-19 Outcomes  
776 in a Longitudinal Cohort of Hospitalized Adults. *Open Forum Infect. Dis.* **9**, ofac027  
777 (2022).
- 778 31. Li, J. *et al.* Two-step fitness selection for intra-host variations in SARS-CoV-2. *Cell*  
779 *Rep.* 110205 (2021) doi:10.1016/j.celrep.2021.110205.
- 780 32. Töpfer, A. *et al.* Sequencing approach to analyze the role of quasispecies for  
781 classical swine fever. *Virology* **438**, 14–19 (2013).
- 782 33. Honce, R. *et al.* Obesity-Related Microenvironment Promotes Emergence of Virulent  
783 Influenza Virus Strains. *mBio* **11**, (2020).

- 784 34. Mathew, D. *et al.* Deep immune profiling of COVID-19 patients reveals distinct  
785 immunotypes with therapeutic implications. *Science* **369**, eabc8511 (2020).
- 786 35. Nicholson, M. D. *et al.* Response to comment on “Genomic epidemiology of  
787 superspreading events in Austria reveals mutational dynamics and transmission  
788 properties of SARS-CoV-2”. *Sci. Transl. Med.* **13**, eabj3222 (2021).
- 789 36. Pathak, A. K. *et al.* Spatio-temporal dynamics of intra-host variability in SARS-CoV-2  
790 genomes. 11.
- 791 37. Armero, A., Berthet, N. & Avarre, J.-C. Intra-Host Diversity of SARS-Cov-2 Should  
792 Not Be Neglected: Case of the State of Victoria, Australia. *Viruses* **13**, 133 (2021).
- 793 38. Walker, A. W. A Lot on Your Plate? Well-to-Well Contamination as an Additional  
794 Confounder in Microbiome Sequence Analyses. *mSystems* **4**, (2019).
- 795 39. Lam, C. *et al.* Sars-CoV-2 Genome Sequencing Methods Differ In Their Ability To  
796 Detect Variants From Low Viral Load Samples. *J. Clin. Microbiol.* (2021)  
797 doi:10.1128/JCM.01046-21.
- 798 40. Bolger, A. M., Lohse, M. & Usadel, B. Trimmomatic: a flexible trimmer for Illumina  
799 sequence data. *Bioinformatics* **30**, 2114–2120 (2014).
- 800 41. Li, H. Minimap2: pairwise alignment for nucleotide sequences. *Bioinformatics* **34**,  
801 3094–3100 (2018).
- 802 42. Tyson, J. R. *et al.* Improvements to the ARTIC multiplex PCR method for SARS-  
803 CoV-2 genome sequencing using nanopore.  
804 <http://biorxiv.org/lookup/doi/10.1101/2020.09.04.283077> (2020)  
805 doi:10.1101/2020.09.04.283077.

- 806 43. Castellano, S. *et al.* iVar, an Interpretation-Oriented Tool to Manage the Update and  
807 Revision of Variant Annotation and Classification. *Genes* **12**, 384 (2021).
- 808 44. Wickham, H. *et al.* Welcome to the Tidyverse. *J. Open Source Softw.* **4**, 1686  
809 (2019).
- 810 45. Friedman, J., Hastie, T. & Tibshirani, R. Regularization Paths for Generalized Linear  
811 Models via Coordinate Descent. *J. Stat. Softw.* **33**, (2010).
- 812 46. nlme: Linear and Nonlinear Mixed Effects Models.
- 813 47. Liaw, A. & Wiener, M. Classification and Regression by randomForest. **2**, 5 (2002).
- 814
